# Supplementary material for: The endogenous molecular clock orchestrates the temporal separation of substrate metabolism in skeletal muscle
Source: PubMed Central journal article supplement (PMC4440511; doi:10.1186/s13395-015-0039-5), 2015-05-16
Supplement: 13395_2015_39_MOESM1_ESM.pdf [file 13395_2015_39_MOESM1_ESM.pdf]

***Acaa2***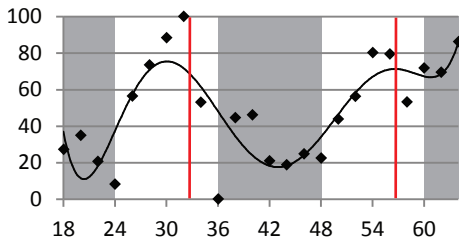***Bhlhe40***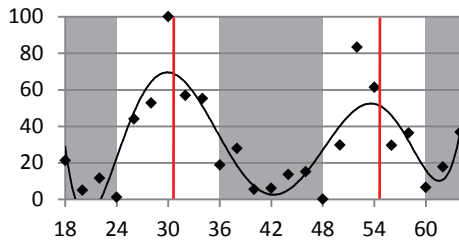***Ech1***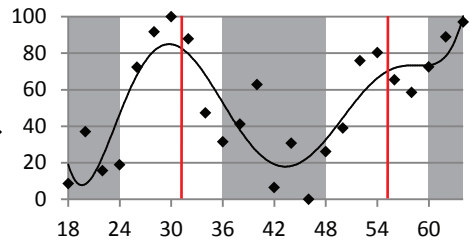***Esrra***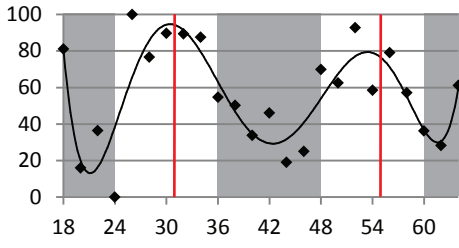***Fabp3***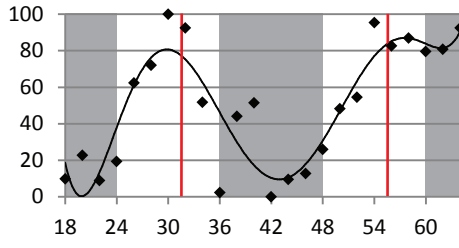***Fabp4***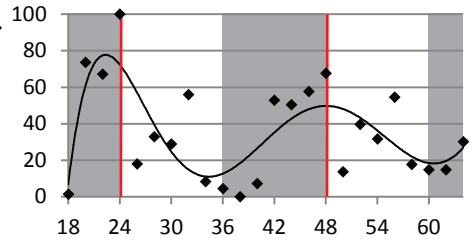***Hadha***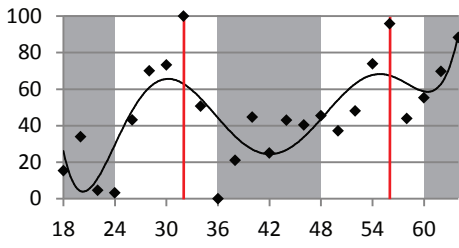***Hadhb***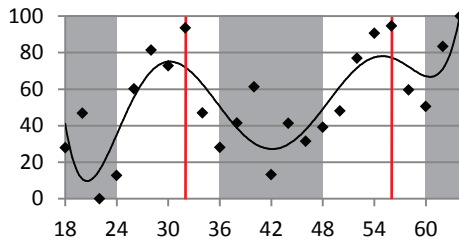***Mlycd***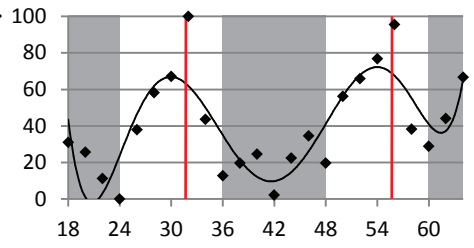***Pdk4***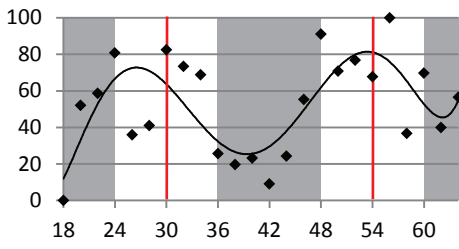***Ppargc1b***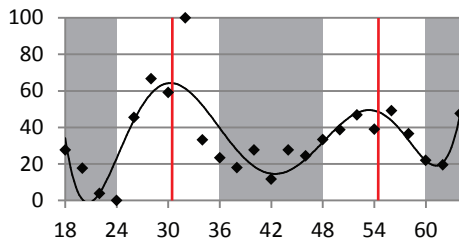***Slc25a20***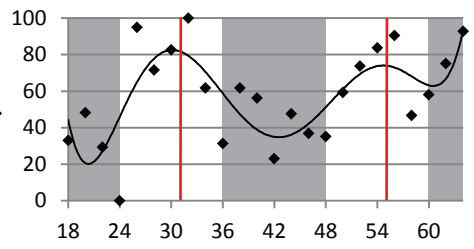

Circadian Time (hr)

***Acaca***

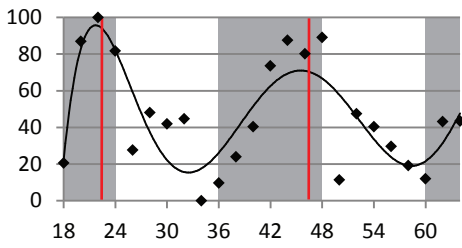

***Acly***

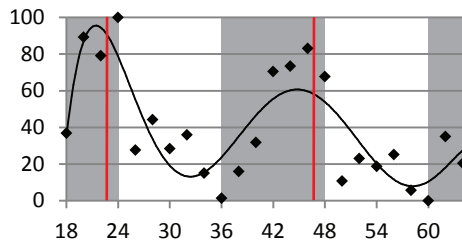

***Acs15***

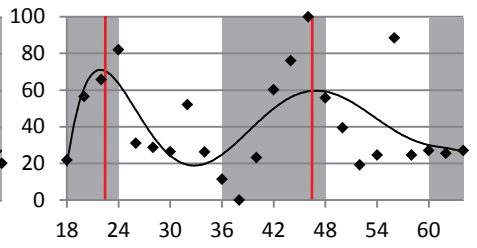

***Dgat1***

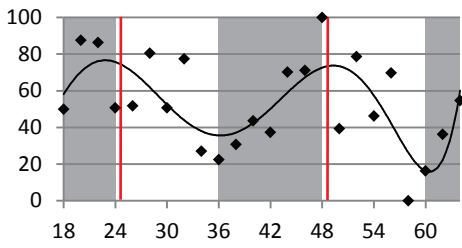

***Elovl5***

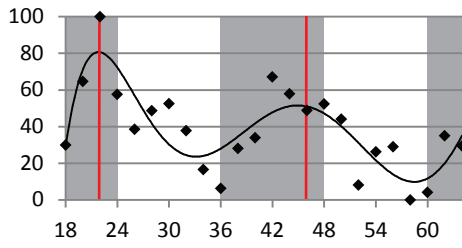

***Fasn***

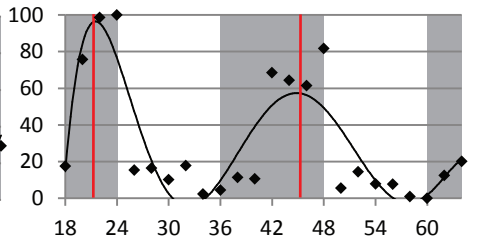

***Lpin1***

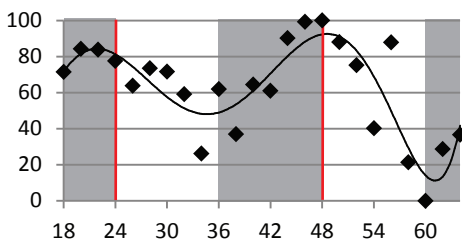

***Pnpla3***

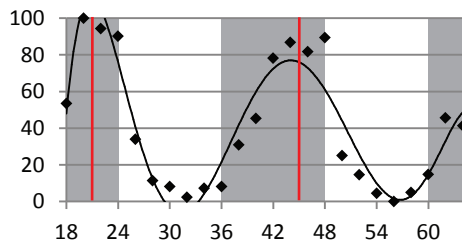

***Scd1***

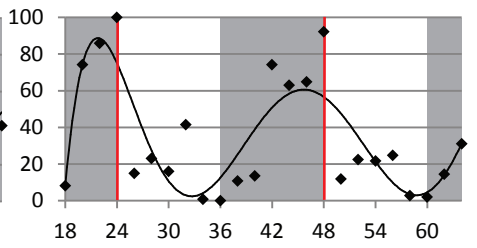

***Sreb1***

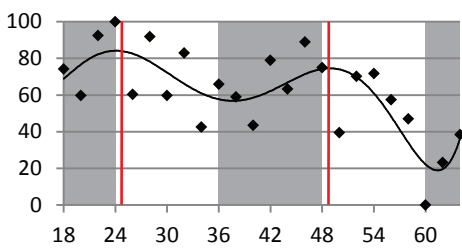

***Sreb2***

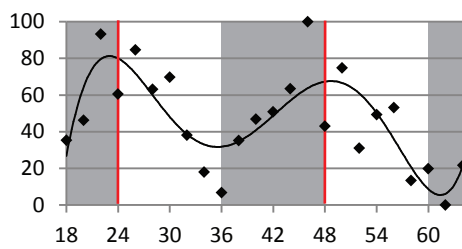

Circadian Time (hr)

Percent Total

***Adrb2***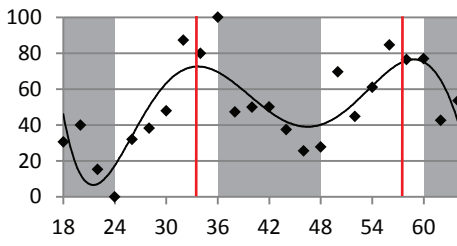***Fbxo40***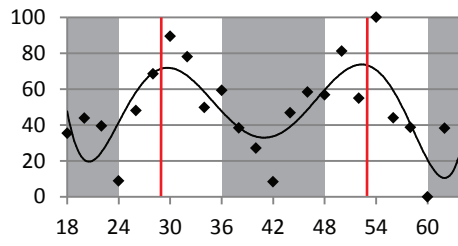***Hk2***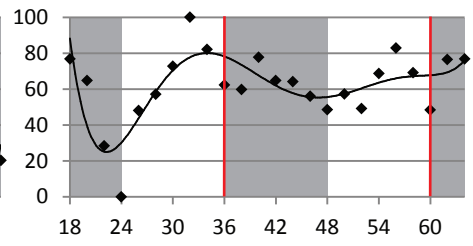***Nrip1***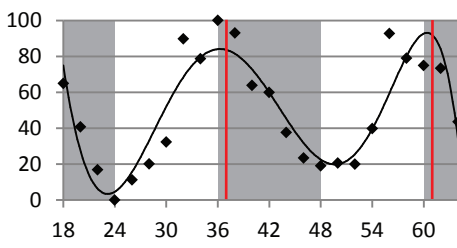***Pdp1***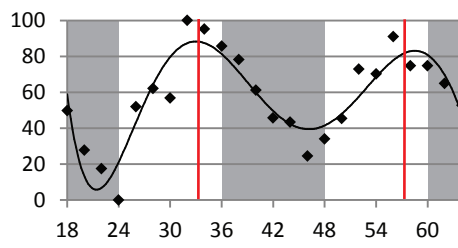***Pfkfb1***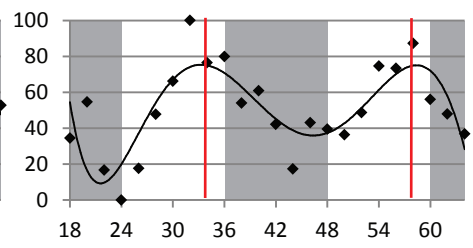***Pfkfb3***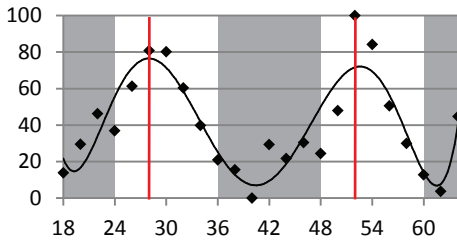***Pfkfb4***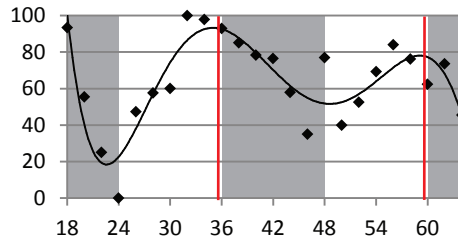***Pik3ip1***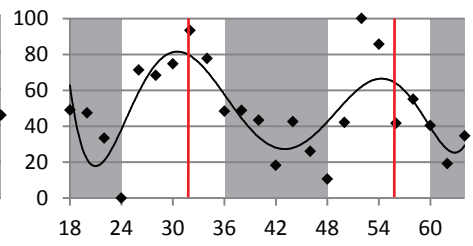

Circadian Time (hr)

Percent Total

***Adrbk1***

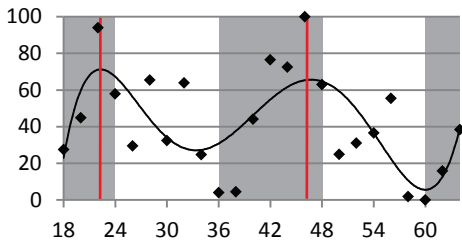

***Arrb1***

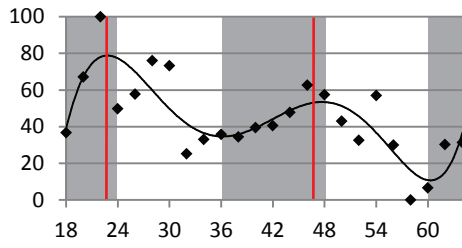

***Arrdc3***

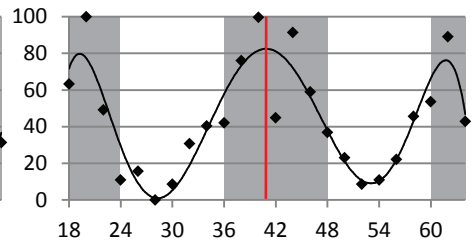

***Irs1***

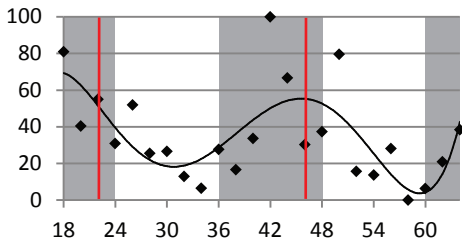

***Pik3r1***

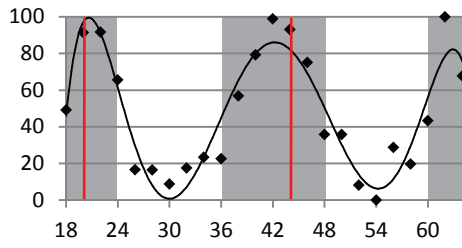

***Ppp1r3c***

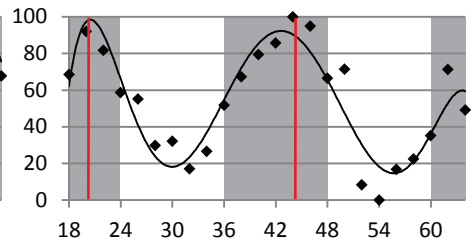

***Stxbp4***

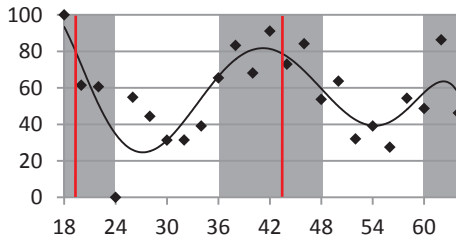

***Tbc1d1***

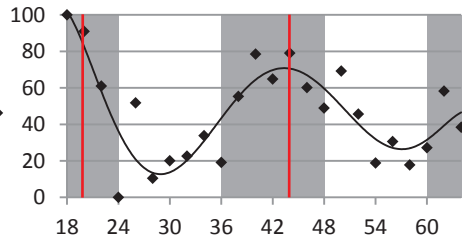

Circadian Time (hr)
