# Supplementary material for: The endogenous molecular clock orchestrates the temporal separation of substrate metabolism in skeletal muscle
Source: PubMed Central journal article supplement (PMC4440511; doi:10.1186/s13395-015-0039-5), 2015-05-16
Supplement: 13395_2015_39_MOESM2_ESM.pdf [file 13395_2015_39_MOESM2_ESM.pdf]

***Adrb2***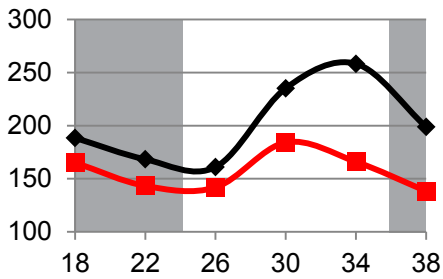***Hk2***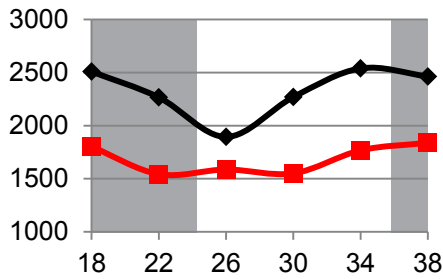***Pdp1***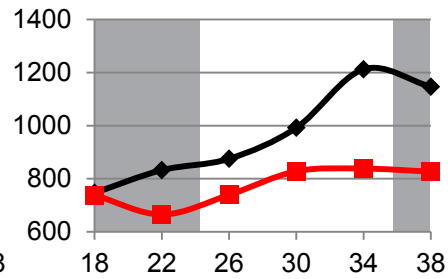***Pfkfb1***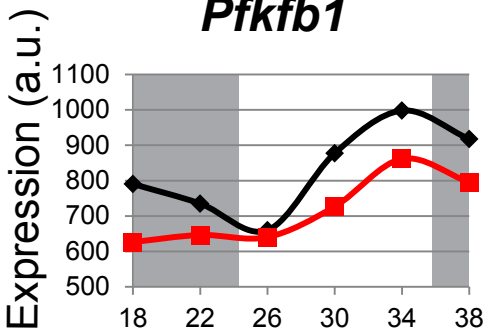***Pfkfb3***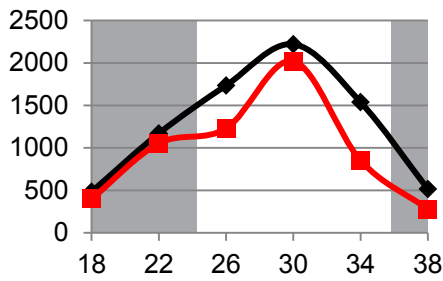***Elovl5***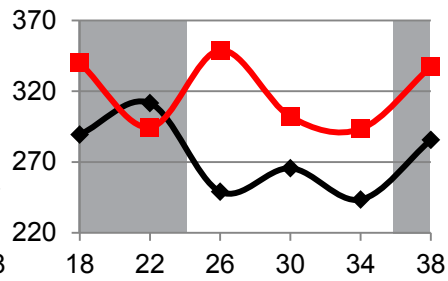***Fabp3***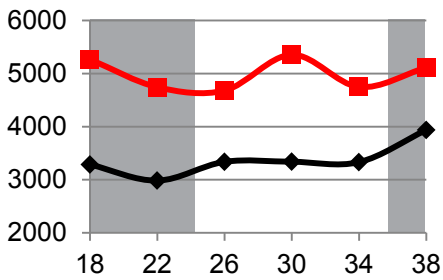***Hadha***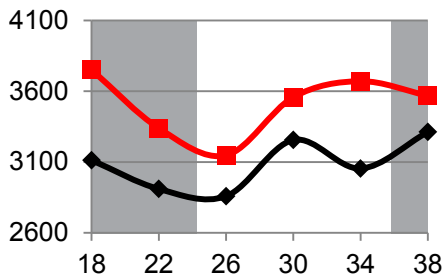***Hadhb***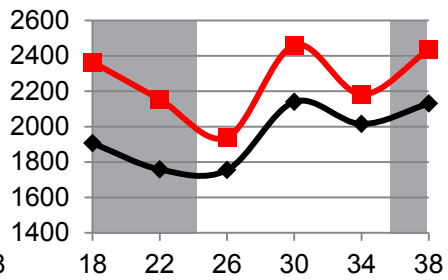***Pnpla3***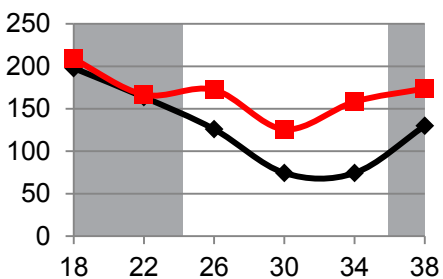

Circadian Time (hr)
